# Supplementary material for: Compositional analysis of topsoil metals and its associations with cancer mortality using spatial misaligned data
Source: PubMed Central journal article supplement (PMC5797570; doi:10.1007/s10653-016-9904-3), 2017-02-02
Supplement: 10653_2016_9904_MOESM1_ESM.pdf [file 10653_2016_9904_MOESM1_ESM.pdf]

Table S1. Number of deaths by different studied tumours produced in continental Spain between the years 1999-2008.

| <b>Cancer site</b>      | <b>ICD-9</b> | <b>ICD-10</b> | <b>Deaths Men</b> | <b>Deaths Women</b> | <b>Total</b> |
|-------------------------|--------------|---------------|-------------------|---------------------|--------------|
| Lung                    | C33-C34      | 162           | 155142            | 21657               | 176799       |
| Buccal cav. and pharynx | C00-C14      | 140-149       | 16274             | 3761                | 20035        |
| Oesophagus              | C15          | 150           | 14287             | 2228                | 16515        |
| Stomach                 | C16          | 151           | 34679             | 21692               | 56371        |
| Pancreas                | C25          | 157           | 22458             | 19816               | 42274        |
| Colorectal              | C18-C21      | 153-154,159.0 | 68353             | 51310               | 119663       |
| Breast                  | C50          | 174           | -                 | 54887               | 54887        |
| Prostate                | C61          | 185           | 52528             | -                   | 52528        |
| Bladder                 | C67          | 188           | 33632             | 7212                | 40844        |
| Kidney                  | C64-C66,C68  | 189           | 11509             | 5854                | 17363        |
| Brain                   | C71          | 191           | 12371             | 9881                | 22252        |
| NHL                     | C82-C85,C96  | 200,202       | 11706             | 10499               | 22205        |
| Leukemias               | C91-C95      | 204-208       | 15861             | 12376               | 28237        |

Table S2. Estimates of the effect (RR and 95% credibility interval (CI)) of factors corresponding to score loads from principal factor analysis, on mortality due to different tumour types, by sex. The table shows the results of the **log-transformed** data analysis unadjusted and adjusted for socio-demographic variables.

| Cancer site               |    | Men   |        |       |       |        |       | Women |        |       |       |        |       |
|---------------------------|----|-------|--------|-------|-------|--------|-------|-------|--------|-------|-------|--------|-------|
|                           |    | Unadj |        |       | Adjus |        |       | Unadj |        |       | Adjus |        |       |
|                           |    | RR    | 95% CI |       | RR    | 95% CI |       | RR    | 95% CI |       | RR    | 95% CI |       |
| Lung                      | F1 | NA    | NA     | NA    | NA    | NA     | NA    | 1.103 | 1.077  | 1.157 | 1.026 | 0.98   | 1.069 |
| Buccal cavity and pharynx | F1 | 0.934 | 0.892  | 0.958 | 0.996 | 0.948  | 1.044 | 0.991 | 0.934  | 1.054 | 0.997 | 0.939  | 1.063 |
| Oesophagus                | F1 | 0.935 | 0.891  | 0.969 | 0.956 | 0.899  | 1.001 | 1.023 | 0.933  | 1.137 | 1.013 | 0.908  | 1.104 |
| Stomach                   | F1 | 0.984 | 0.934  | 1.054 | 1.007 | 0.963  | 1.046 | 0.957 | 0.904  | 1.011 | 0.995 | 0.952  | 1.039 |
| Pancreas                  | F1 | 0.978 | 0.949  | 1.017 | 1.002 | 0.971  | 1.042 | 0.945 | 0.919  | 0.981 | 0.981 | 0.947  | 1.02  |
| Colorectal                | F1 | 1.069 | 1.053  | 1.101 | 1.013 | 0.986  | 1.042 | 0.973 | 0.954  | 1.002 | 1.011 | 0.987  | 1.042 |
| Breast                    | F1 |       |        |       |       |        |       | 0.97  | 0.931  | 1.004 | 1.004 | 0.976  | 1.03  |
| Prostate                  | F1 | 1.007 | 0.964  | 1.104 | 1     | 0.975  | 1.03  |       |        |       |       |        |       |
| Bladder                   | F1 | 0.93  | 0.896  | 0.947 | 0.99  | 0.957  | 1.03  | 1.062 | 0.934  | 1.352 | 0.995 | 0.95   | 1.044 |
| Kidney                    | F1 | 1.007 | 0.962  | 1.057 | 1.011 | 0.969  | 1.061 | 0.98  | 0.929  | 1.038 | 0.993 | 0.941  | 1.047 |
| Brain                     | F1 | 1     | 0.967  | 1.039 | 1.008 | 0.97   | 1.043 | 1.023 | 0.976  | 1.066 | 1.026 | 0.986  | 1.078 |
| NHL                       | F1 | 0.919 | 0.866  | 0.967 | 0.996 | 0.949  | 1.041 | 1.055 | 1.012  | 1.088 | 1.016 | 0.976  | 1.057 |
| Leukemias                 | F1 | 0.984 | 0.96   | 1.012 | 0.998 | 0.965  | 1.033 | 1     | 0.954  | 1.096 | 0.99  | 0.955  | 1.032 |
| Lung                      | F2 | 0.85  | 0.823  | 0.871 | 0.952 | 0.918  | 0.989 | 1.151 | 1.113  | 1.235 | 1.016 | 0.946  | 1.075 |
| Buccal cavity and pharynx | F2 | 0.797 | 0.752  | 0.844 | 0.907 | 0.846  | 0.965 | 1.102 | 1.01   | 1.197 | 1.089 | 0.994  | 1.188 |
| Oesophagus                | F2 | 1.077 | 1.004  | 1.136 | 0.961 | 0.899  | 1.029 | 1.249 | 1.087  | 1.395 | 1.148 | 0.838  | 1.357 |
| Stomach                   | F2 | 0.939 | 0.876  | 0.988 | 0.99  | 0.941  | 1.042 | 0.928 | 0.875  | 0.987 | 0.996 | 0.937  | 1.056 |
| Pancreas                  | F2 | 1.044 | 0.982  | 1.092 | 1.019 | 0.975  | 1.067 | 1.016 | 0.928  | 1.074 | 0.994 | 0.938  | 1.042 |
| Colorectal                | F2 | 0.915 | 0.876  | 0.935 | 0.99  | 0.955  | 1.027 | 0.941 | 0.914  | 0.979 | 0.975 | 0.942  | 1.009 |
| Breast                    | F2 |       |        |       |       |        |       | 1.01  | 0.944  | 1.06  | 0.978 | 0.943  | 1.013 |
| Prostate                  | F2 | 1.014 | 0.965  | 1.05  | 1.01  | 0.975  | 1.048 |       |        |       |       |        |       |
| Bladder                   | F2 | 0.904 | 0.859  | 0.928 | 0.975 | 0.928  | 1.021 | 1.038 | 0.961  | 1.1   | 0.998 | 0.935  | 1.072 |
| Kidney                    | F2 | 0.97  | 0.905  | 1.03  | 0.972 | 0.916  | 1.036 | 0.998 | 0.92   | 1.073 | 1.008 | 0.932  | 1.085 |
| Brain                     | F2 | 0.986 | 0.935  | 1.033 | 0.978 | 0.933  | 1.034 | 1.028 | 0.97   | 1.096 | 1.027 | 0.969  | 1.096 |
| NHL                       | F2 | 0.915 | 0.868  | 0.977 | 0.961 | 0.9    | 1.021 | 1.054 | 0.935  | 1.126 | 1.045 | 0.982  | 1.104 |
| Leukemias                 | F2 | 1.038 | 0.989  | 1.075 | 0.993 | 0.93   | 1.04  | 1.021 | 0.968  | 1.072 | 1.013 | 0.964  | 1.075 |
| Lung                      | F3 | 1.082 | 1.071  | 1.106 | 1.123 | 1.084  | 1.146 | 1.119 | 1.092  | 1.165 | 1.037 | 0.98   | 1.077 |
| Buccal cavity and pharynx | F3 | 1.137 | 1.097  | 1.22  | 1.062 | 1.015  | 1.109 | 1.053 | 0.985  | 1.112 | 1.025 | 0.97   | 1.089 |
| Oesophagus                | F3 | 1.099 | 1.069  | 1.149 | 1.063 | 0.992  | 1.113 | 1.175 | 1.089  | 1.292 | 1.121 | 1.026  | 1.225 |
| Stomach                   | F3 | 1.097 | 0.999  | 1.297 | 1.008 | 0.98   | 1.048 | 0.957 | 0.917  | 0.987 | 0.977 | 0.939  | 1.022 |
| Pancreas                  | F3 | 1.048 | 1.018  | 1.08  | 1.019 | 0.98   | 1.049 | 1.041 | 1.003  | 1.074 | 1.017 | 0.983  | 1.05  |
| Colorectal                | F3 | 1.055 | 1.038  | 1.08  | 0.991 | 0.966  | 1.017 | 1.03  | 1.004  | 1.049 | 0.987 | 0.966  | 1.012 |
| Breast                    | F3 |       |        |       |       |        |       | 1.063 | 1.038  | 1.116 | 1.004 | 0.977  | 1.027 |
| Prostate                  | F3 | 1.048 | 1.022  | 1.065 | 0.998 | 0.973  | 1.024 |       |        |       |       |        |       |
| Bladder                   | F3 | 1.048 | 1.032  | 1.082 | 0.99  | 0.953  | 1.022 | 1.019 | 0.971  | 1.058 | 0.972 | 0.925  | 1.011 |
| Kidney                    | F3 | 1.036 | 0.993  | 1.079 | 1.014 | 0.973  | 1.054 | 1.025 | 0.967  | 1.077 | 1.017 | 0.964  | 1.066 |
| Brain                     | F3 | 1.001 | 0.913  | 1.048 | 0.999 | 0.968  | 1.034 | 1.015 | 0.973  | 1.049 | 0.988 | 0.945  | 1.025 |
| NHL                       | F3 | 1.087 | 1.058  | 1.133 | 1.019 | 0.969  | 1.06  | 1.082 | 1.046  | 1.131 | 1.044 | 1.002  | 1.081 |
| Leukemias                 | F3 | 1.056 | 1.024  | 1.087 | 1.048 | 1.015  | 1.08  | 1.026 | 0.994  | 1.06  | 1.018 | 0.985  | 1.056 |
| Lung                      | F4 | 1.111 | 1.089  | 1.144 | 0.993 | 0.95   | 1.032 | 1.155 | 1.114  | 1.24  | 1.009 | 0.953  | 1.068 |
| Buccal cavity and pharynx | F4 | 1.125 | 1.088  | 1.195 | 1.052 | 0.989  | 1.121 | 1.062 | 0.981  | 1.143 | 1.053 | 0.977  | 1.139 |
| Oesophagus                | F4 | 1.163 | 1.112  | 1.222 | 1.023 | 0.962  | 1.095 | 1.1   | 0.958  | 1.278 | 1.122 | 0.975  | 1.445 |

|            |    |       |       |       |       |       |       |       |       |       |       |       |       |
|------------|----|-------|-------|-------|-------|-------|-------|-------|-------|-------|-------|-------|-------|
| Stomach    | F4 | 0.938 | 0.878 | 0.992 | 0.977 | 0.929 | 1.03  | 1.095 | 1.031 | 1.202 | 1.018 | 0.962 | 1.082 |
| Pancreas   | F4 | 1.091 | 1.044 | 1.16  | 1.029 | 0.988 | 1.083 | 1.039 | 0.964 | 1.097 | 0.998 | 0.954 | 1.048 |
| Colorectal | F4 | 1.103 | 1.081 | 1.145 | 1.036 | 0.999 | 1.072 | 1.025 | 0.983 | 1.067 | 0.99  | 0.958 | 1.023 |
| Breast     | F4 |       |       |       |       |       |       | 1.107 | 1.043 | 1.145 | 0.996 | 0.964 | 1.036 |
| Prostate   | F4 | 1.029 | 0.993 | 1.067 | 1.014 | 0.979 | 1.05  |       |       |       |       |       |       |
| Bladder    | F4 | 1.131 | 1.128 | 1.59  | 1.044 | 0.994 | 1.095 | 1.084 | 1.02  | 1.161 | 1.051 | 0.995 | 1.12  |
| Kidney     | F4 | 1.117 | 1.055 | 1.196 | 1.061 | 1.006 | 1.133 | 1.042 | 0.975 | 1.152 | 1.005 | 0.944 | 1.082 |
| Brain      | F4 | 1.057 | 1.015 | 1.108 | 1.035 | 0.993 | 1.084 | 1.12  | 1.061 | 1.184 | 1.11  | 1.054 | 1.171 |
| NHL        | F4 | 1.114 | 1.065 | 1.191 | 1.016 | 0.963 | 1.085 | 1.07  | 1.015 | 1.116 | 0.981 | 0.934 | 1.036 |
| Leukemias  | F4 | 1.035 | 0.991 | 1.07  | 0.997 | 0.957 | 1.048 | 0.988 | 0.95  | 1.031 | 0.981 | 0.936 | 1.027 |

F1: Ni Cu Fe Zn Cr

F2: Al Cr Fe

F3: Pb Zn Fe As

F4: Cd

Table S3. Estimates of the effect (RR and 95% credibility interval (CI)) of factors corresponding to score loads from principal factor analysis, on mortality due to different tumour types, by sex. The table shows the results of the **clr-transformed** data analysis unadjusted and adjusted for socio-demographic variables.

| Cancer site               |       | Men   |        |       |       |        |       | Women |        |       |       |        |       |
|---------------------------|-------|-------|--------|-------|-------|--------|-------|-------|--------|-------|-------|--------|-------|
|                           |       | Unadj |        |       | Adjus |        |       | Unadj |        |       | Adjus |        |       |
|                           |       | RR    | 95% CI |       | RR    | 95% CI |       | RR    | 95% CI |       | RR    | 95% CI |       |
| Lung                      | F1 Cd | NA    | NA     | NA    | 1.003 | 0.958  | 1.044 | 0.919 | 0.867  | 0.944 | 0.948 | 0.897  | 1.007 |
| Buccal cavity and pharynx | F1    | 1.147 | 1.107  | 1.219 | 1.099 | 1.033  | 1.181 | 0.952 | 0.88   | 1.036 | 0.987 | 0.908  | 1.065 |
| Oesophagus                | F1    | 1.111 | 1.069  | 1.186 | 1.052 | 0.982  | 1.126 | 0.889 | 0.79   | 0.98  | 0.978 | 0.851  | 1.25  |
| Stomach                   | F1    | 0.952 | 0.877  | 1.042 | 0.981 | 0.931  | 1.041 | 1.06  | 1.013  | 1.128 | 1.001 | 0.944  | 1.07  |
| Pancreas                  | F1    | 1.052 | 0.981  | 1.11  | 1.014 | 0.973  | 1.064 | 1.052 | 0.999  | 1.1   | 1.01  | 0.965  | 1.064 |
| Colorectal                | F1    | 1.099 | 1.074  | 1.148 | 1.023 | 0.984  | 1.06  | 1.042 | 0.995  | 1.081 | 0.999 | 0.968  | 1.04  |
| Breast                    | F1    |       |        |       |       |        |       | 1.091 | 1.063  | 1.143 | 1.026 | 0.992  | 1.064 |
| Prostate                  | F1    | 1.029 | 0.993  | 1.06  | 1.002 | 0.966  | 1.041 |       |        |       |       |        |       |
| Bladder                   | F1    | 1.167 | 1.131  | 1.217 | 1.057 | 1.008  | 1.11  | 1.054 | 0.955  | 1.127 | 1.043 | 0.987  | 1.111 |
| Kidney                    | F1    | 1.065 | 1.002  | 1.164 | 1.049 | 0.992  | 1.11  | 1.034 | 0.971  | 1.111 | 1.006 | 0.943  | 1.099 |
| Brain                     | F1    | 1.024 | 0.986  | 1.077 | 1.018 | 0.976  | 1.066 | 1.077 | 0.985  | 1.142 | 1.081 | 1.024  | 1.142 |
| NHL                       | F1    | 1.138 | 1.082  | 1.25  | 1.027 | 0.971  | 1.093 | 0.93  | 0.892  | 0.974 | 0.98  | 0.927  | 1.03  |
| Leukemias                 | F1    | 0.989 | 0.935  | 1.108 | 0.988 | 0.934  | 1.099 | 0.992 | 0.955  | 1.041 | 0.998 | 0.945  | 1.042 |
| Lung                      | F2 Pb | 1.069 | 1.053  | 1.101 | 1.038 | 1.009  | 1.069 | 1.117 | 1.081  | 1.199 | 1.017 | 0.967  | 1.056 |
| Buccal cavity and pharynx | F2    | 1.103 | 1.077  | 1.153 | 1.062 | 1.019  | 1.112 | 1.051 | 0.996  | 1.096 | 1.008 | 0.954  | 1.062 |
| Oesophagus                | F2    | 1.094 | 1.062  | 1.144 | 1.065 | 1.013  | 1.112 | 1.083 | 1.004  | 1.208 | 1.093 | 1.013  | 1.202 |
| Stomach                   | F2    | 1.052 | 1.007  | 1.114 | 1.019 | 0.984  | 1.072 | 0.96  | 0.923  | 1.008 | 0.99  | 0.95   | 1.03  |
| Pancreas                  | F2    | 1.042 | 1.007  | 1.069 | 1.002 | 0.974  | 1.034 | 1.033 | 0.998  | 1.072 | 1.013 | 0.981  | 1.051 |
| Colorectal                | F2    | 1.095 | 1.054  | 1.198 | 0.994 | 0.967  | 1.019 | 1.032 | 1.004  | 1.052 | 0.987 | 0.966  | 1.011 |
| Breast                    | F2    |       |        |       |       |        |       | 1.056 | 1.038  | 1.085 | 1.001 | 0.981  | 1.026 |
| Prostate                  | F2    | 0.999 | 0.921  | 1.04  | 0.997 | 0.973  | 1.024 |       |        |       |       |        |       |
| Bladder                   | F2    | 1.076 | 1.057  | 1.115 | 0.994 | 0.962  | 1.029 | 1.024 | 0.977  | 1.062 | 0.982 | 0.93   | 1.021 |
| Kidney                    | F2    | 1.038 | 0.996  | 1.083 | 1.007 | 0.969  | 1.048 | 1.031 | 0.986  | 1.092 | 1.016 | 0.972  | 1.065 |
| Brain                     | F2    | 1.01  | 0.97   | 1.039 | 0.991 | 0.961  | 1.023 | 1.015 | 0.974  | 1.046 | 0.982 | 0.945  | 1.017 |
| NHL                       | F2    | 1.083 | 1.047  | 1.13  | 1.02  | 0.975  | 1.061 | 1.052 | 1.013  | 1.083 | 1.007 | 0.973  | 1.046 |
| Leukemias                 | F2    | 1.055 | 1.02   | 1.084 | 1.046 | 1.013  | 1.076 | 0.988 | 0.858  | 1.055 | 1.022 | 0.986  | 1.053 |
| Lung                      | F3 As | 1.082 | 1.057  | 1.147 | 1.03  | 0.995  | 1.065 | 1.239 | 1.177  | 1.364 | 1.036 | 0.984  | 1.089 |
| Buccal cavity and pharynx | F3    | 1.165 | 1.097  | 1.228 | 1.054 | 0.996  | 1.118 | 0.924 | 0.876  | 0.996 | 1.007 | 0.933  | 1.095 |
| Oesophagus                | F3    | 0.936 | 0.893  | 0.993 | 1.017 | 0.957  | 1.077 | 0.913 | 0.818  | 1.016 | 0.891 | 0.798  | 1     |
| Stomach                   | F3    | 1.042 | 0.952  | 1.101 | 1.028 | 0.983  | 1.077 | 1.057 | 0.974  | 1.12  | 1.017 | 0.966  | 1.073 |
| Pancreas                  | F3    | 1.039 | 0.992  | 1.074 | 1.012 | 0.97   | 1.052 | 1.035 | 0.985  | 1.073 | 1.004 | 0.959  | 1.046 |
| Colorectal                | F3    | 1.097 | 1.076  | 1.137 | 1.034 | 0.993  | 1.066 | 1.05  | 1.014  | 1.076 | 1.022 | 0.993  | 1.054 |
| Breast                    | F3    |       |        |       |       |        |       | 0.945 | 0.918  | 0.982 | 0.999 | 0.962  | 1.028 |
| Prostate                  | F3    | 1.019 | 0.987  | 1.043 | 1.002 | 0.967  | 1.034 |       |        |       |       |        |       |
| Bladder                   | F3    | 1.059 | 1.036  | 1.107 | 1.037 | 0.995  | 1.082 | 1.025 | 0.964  | 1.09  | 1.019 | 0.963  | 1.082 |
| Kidney                    | F3    | 1.047 | 0.99   | 1.111 | 1.047 | 0.992  | 1.103 | 0.981 | 0.916  | 1.047 | 0.995 | 0.929  | 1.059 |
| Brain                     | F3    | 1.039 | 0.997  | 1.096 | 1.064 | 1.016  | 1.108 | 1.012 | 0.959  | 1.067 | 1.027 | 0.968  | 1.079 |
| NHL                       | F3    | 1.07  | 0.992  | 1.134 | 1.026 | 0.972  | 1.082 | 1.06  | 1.006  | 1.103 | 1.016 | 0.969  | 1.072 |
| Leukemias                 | F3    | 1.034 | 0.993  | 1.065 | 1.007 | 0.962  | 1.047 | 1.012 | 0.964  | 1.048 | 0.994 | 0.95   | 1.039 |
| Lung                      | F4 Mn | 0.914 | 0.885  | 0.93  | 0.996 | 0.968  | 1.04  | 0.904 | 0.86   | 0.926 | 0.979 | 0.934  | 1.03  |
| Buccal cavity and pharynx | F4    | 0.857 | 0.825  | 0.89  | 0.967 | 0.921  | 1.028 | 0.892 | 0.828  | 0.942 | 0.906 | 0.844  | 0.959 |
| Oesophagus                | F4    | 0.908 | 0.861  | 0.941 | 0.976 | 0.93   | 1.036 | 0.914 | 0.823  | 1.014 | 0.926 | 0.84   | 1.044 |

|                           |       |       |       |       |       |       |       |       |       |       |       |       |       |
|---------------------------|-------|-------|-------|-------|-------|-------|-------|-------|-------|-------|-------|-------|-------|
| Stomach                   | F4    | 1.051 | 1.02  | 1.094 | 1.058 | 1.012 | 1.099 | 1.039 | 0.97  | 1.091 | 1.008 | 0.959 | 1.055 |
| Pancreas                  | F4    | 0.961 | 0.926 | 1     | 0.997 | 0.962 | 1.031 | 0.961 | 0.923 | 1.003 | 0.986 | 0.951 | 1.026 |
| Colorectal                | F4    | 0.938 | 0.91  | 0.952 | 1.01  | 0.981 | 1.038 | 0.961 | 0.939 | 0.994 | 1.018 | 0.983 | 1.044 |
| Breast                    | F4    |       |       |       |       |       |       | 0.927 | 0.854 | 0.963 | 1.018 | 0.987 | 1.046 |
| Prostate                  | F4    | 0.998 | 0.963 | 1.066 | 1.017 | 0.989 | 1.047 |       |       |       |       |       |       |
| Bladder                   | F4    | 0.882 | 0.842 | 0.907 | 0.998 | 0.962 | 1.039 | 0.951 | 0.893 | 1.002 | 0.963 | 0.913 | 1.013 |
| Kidney                    | F4    | 0.975 | 0.926 | 1.021 | 1.004 | 0.951 | 1.05  | 0.993 | 0.935 | 1.053 | 1.013 | 0.953 | 1.075 |
| Brain                     | F4    | 1.011 | 0.972 | 1.052 | 1.036 | 0.996 | 1.078 | 0.947 | 0.903 | 0.995 | 0.96  | 0.917 | 1.008 |
| NHL                       | F4    | 0.881 | 0.812 | 0.924 | 0.976 | 0.931 | 1.028 | 0.952 | 0.92  | 0.998 | 1.017 | 0.968 | 1.062 |
| Leukemias                 | F4    | 0.984 | 0.951 | 1.026 | 1.003 | 0.965 | 1.041 | 0.993 | 0.956 | 1.05  | 1.007 | 0.967 | 1.052 |
| Lung                      | F5 Cu | 1.12  | 1.101 | 1.15  | 1.032 | 1     | 1.061 | 1.118 | 1.091 | 1.171 | 1.053 | 1.01  | 1.101 |
| Buccal cavity and pharynx | F5    | 1.152 | 1.119 | 1.21  | 1.093 | 1.043 | 1.15  | 1.05  | 0.986 | 1.103 | 1.009 | 0.948 | 1.081 |
| Oesophagus                | F5    | 1.065 | 0.996 | 1.164 | 0.993 | 0.944 | 1.043 | 0.841 | 0.57  | 1.14  | 1.031 | 0.932 | 1.134 |
| Stomach                   | F5    | 0.981 | 0.937 | 1.054 | 0.99  | 0.954 | 1.032 | 0.972 | 0.922 | 1.05  | 0.984 | 0.944 | 1.035 |
| Pancreas                  | F5    | 1.036 | 0.994 | 1.068 | 0.99  | 0.959 | 1.026 | 0.97  | 0.942 | 1.01  | 0.988 | 0.953 | 1.038 |
| Colorectal                | F5    | 1.073 | 1.058 | 1.104 | 1.024 | 0.997 | 1.052 | 1.073 | 1.038 | 1.096 | 1.016 | 0.99  | 1.041 |
| Breast                    | F5    |       |       |       |       |       |       | 1.095 | 1.034 | 1.237 | 1     | 0.975 | 1.028 |
| Prostate                  | F5    | 0.998 | 0.961 | 1.074 | 0.981 | 0.953 | 1.008 |       |       |       |       |       |       |
| Bladder                   | F5    | 1.073 | 1.052 | 1.116 | 1.001 | 0.968 | 1.043 | 0.975 | 0.81  | 1.066 | 0.998 | 0.947 | 1.047 |
| Kidney                    | F5    | 1.066 | 1.006 | 1.19  | 1.029 | 0.986 | 1.088 | 1.005 | 0.952 | 1.069 | 0.994 | 0.944 | 1.054 |
| Brain                     | F5    | 1.003 | 0.971 | 1.045 | 0.993 | 0.956 | 1.031 | 1.022 | 0.966 | 1.066 | 1.01  | 0.966 | 1.056 |
| NHL                       | F5    | 1.158 | 1.056 | 1.399 | 1.033 | 0.984 | 1.081 | 1.043 | 0.997 | 1.077 | 0.987 | 0.947 | 1.032 |
| Leukemias                 | F5    | 1.044 | 1.011 | 1.093 | 1.039 | 1.005 | 1.078 | 1.004 | 0.949 | 1.04  | 0.995 | 0.953 | 1.032 |

F1: Cd -Fe -Al  
F2: -Ni -Cr Pb Zn  
F3: As  
F4: Mn  
F5: Cu
